# Supplementary material
Source: PubMed Central journal article supplement (PMC5412904)

Fig 1.B

API5

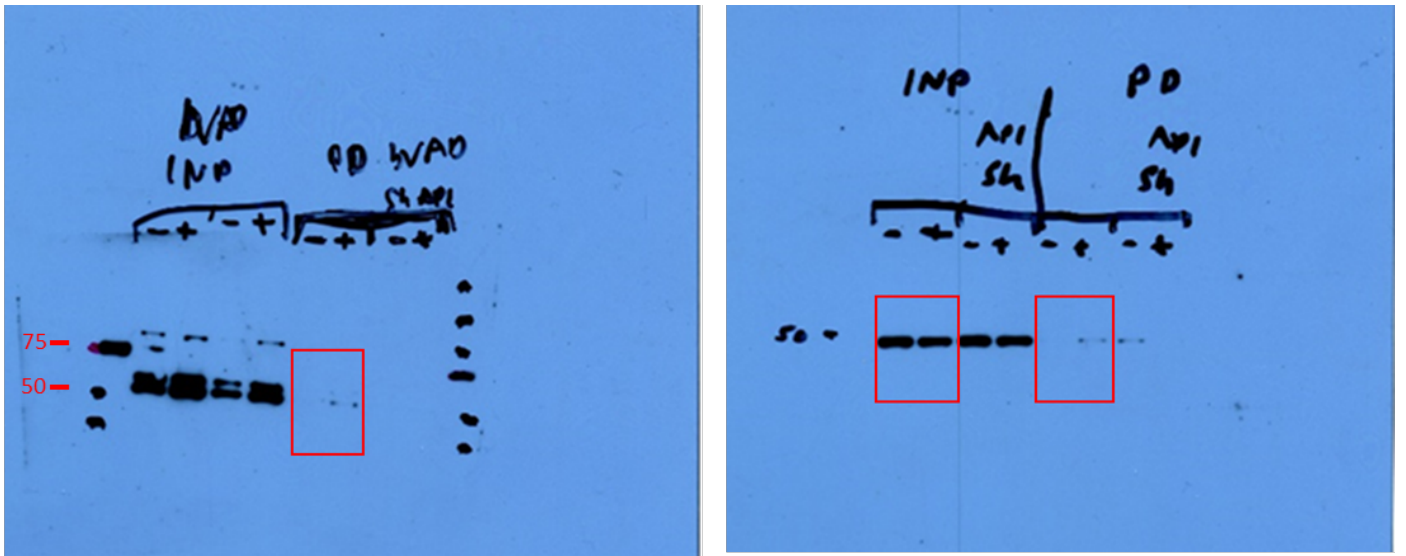

Fig 1.C.Co.API5

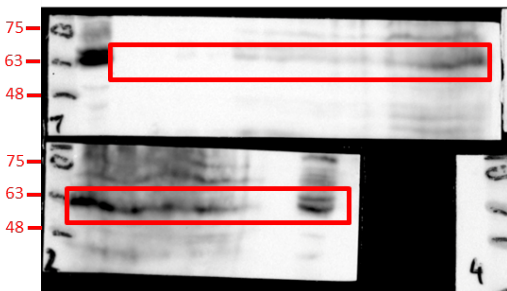

Fig 1.C.Co. Caspase-2

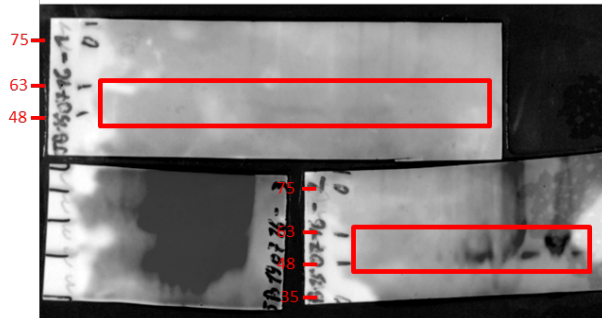

Fig 1.C.aTox. API5

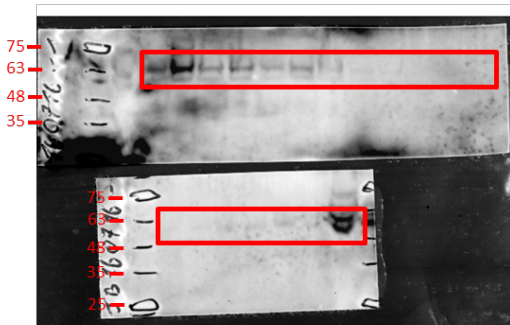

Fig 1.C.aTox. Caspase-2

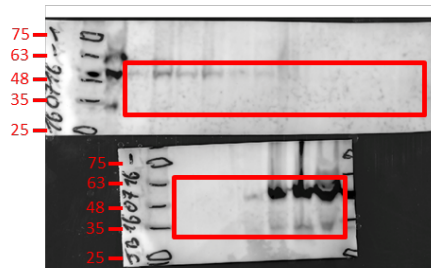

Supplement: EMBR-18-733-s003.pdf [file EMBR-18-733-s003.pdf]

Fig 2.A

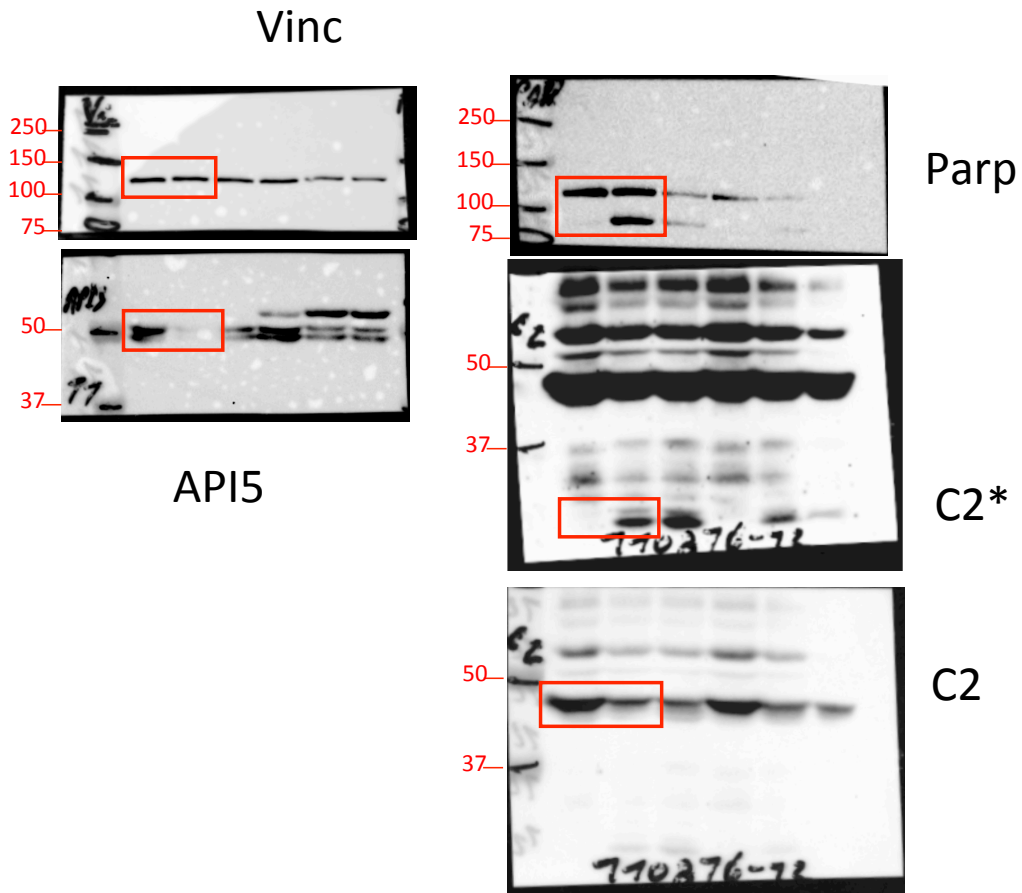

Fig 2.D

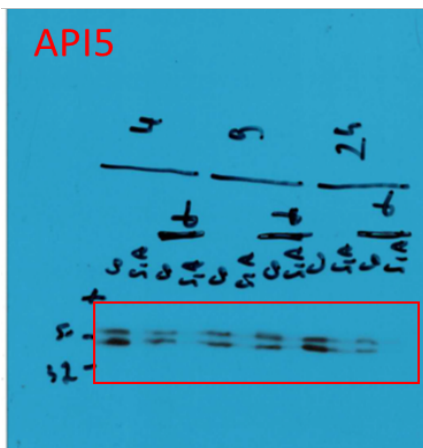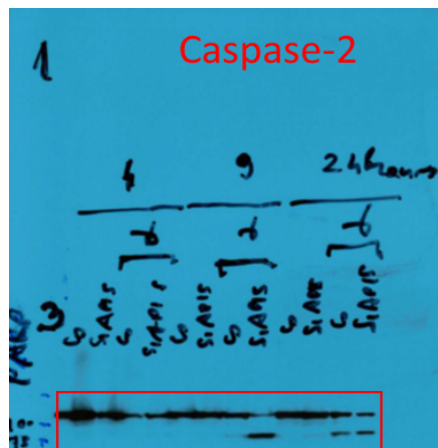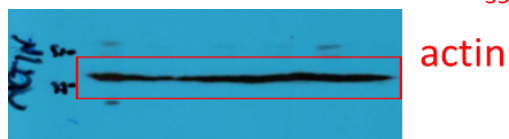

Fig 2.G

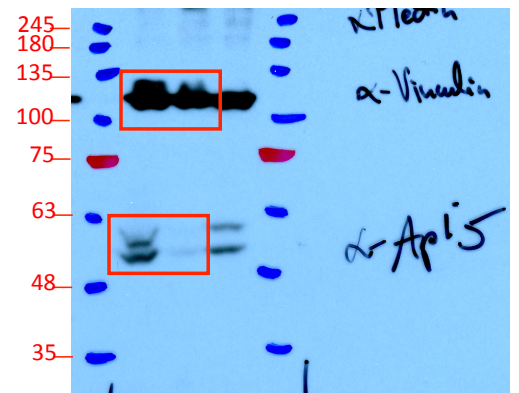

Supplement: EMBR-18-733-s004.pdf [file EMBR-18-733-s004.pdf]

Fig 3.A

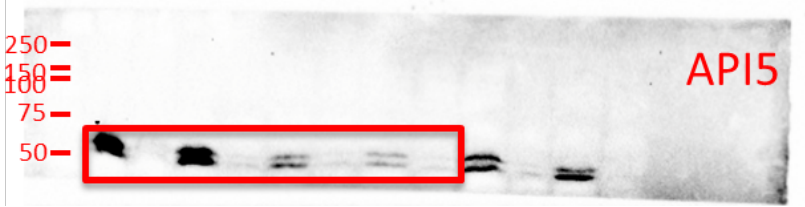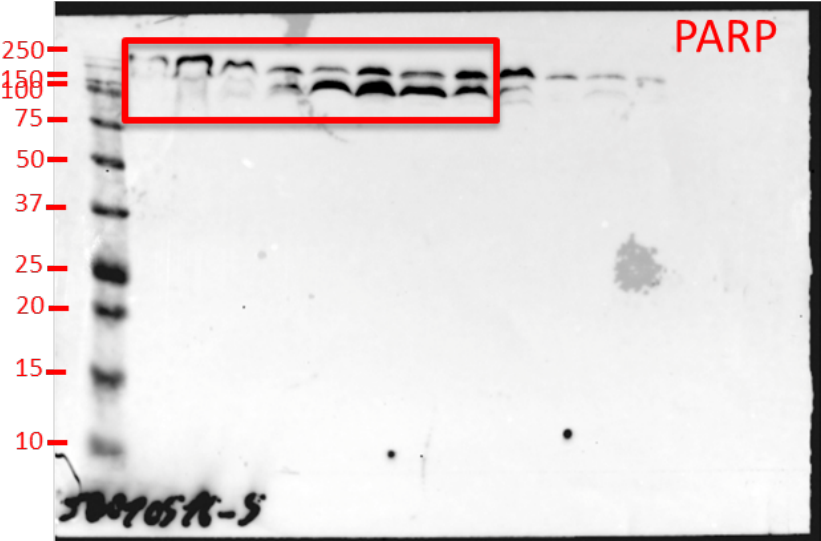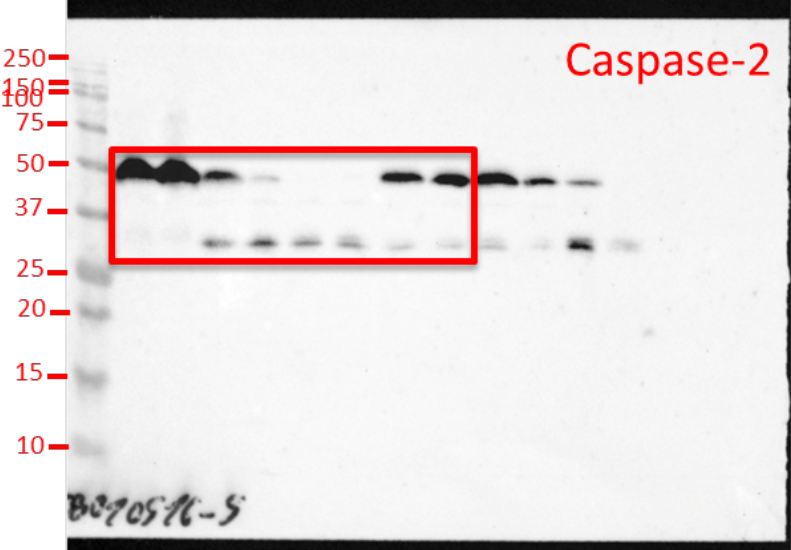

Supplement: EMBR-18-733-s005.pdf [file EMBR-18-733-s005.pdf]

Fig 4.A

API5

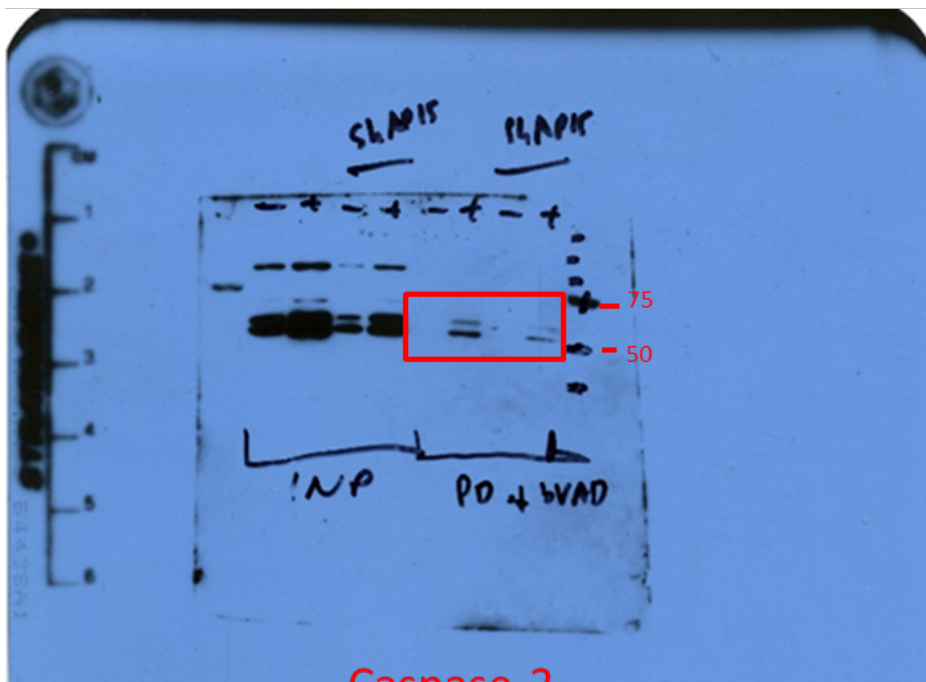

Caspase-2

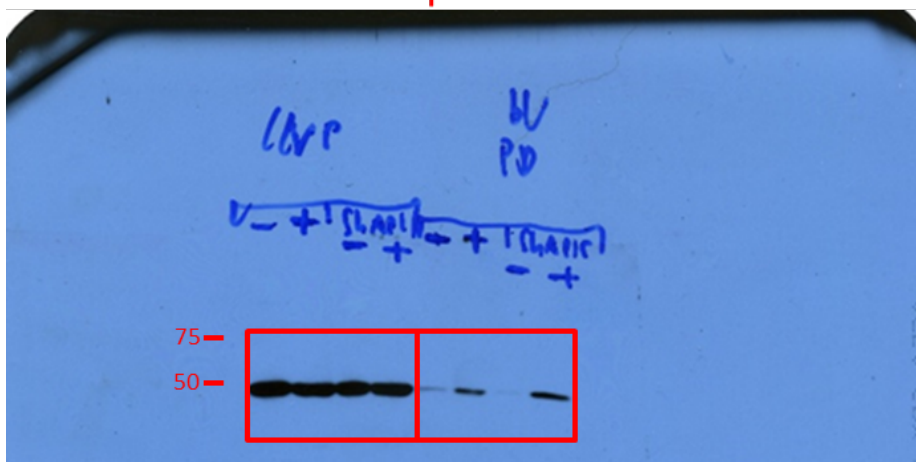

Caspase-2

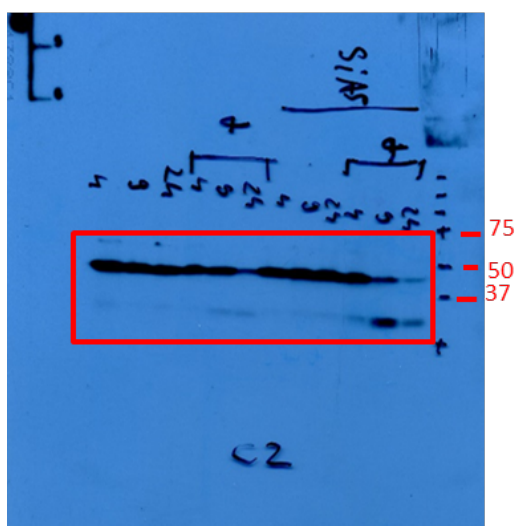

Fig 4.B.

Supplement: EMBR-18-733-s006.pdf [file EMBR-18-733-s006.pdf]
